# Supplementary material
Source: PubMed Central journal article supplement (PMC6341291)
Supplement: DC181785SupplementaryData.pdf [file DC181785SupplementaryData.pdf]

SUPPLEMENTARY DATA

**Supplementary Figure S1.** Flow chart showing Construction of overall Genetic Risk score.

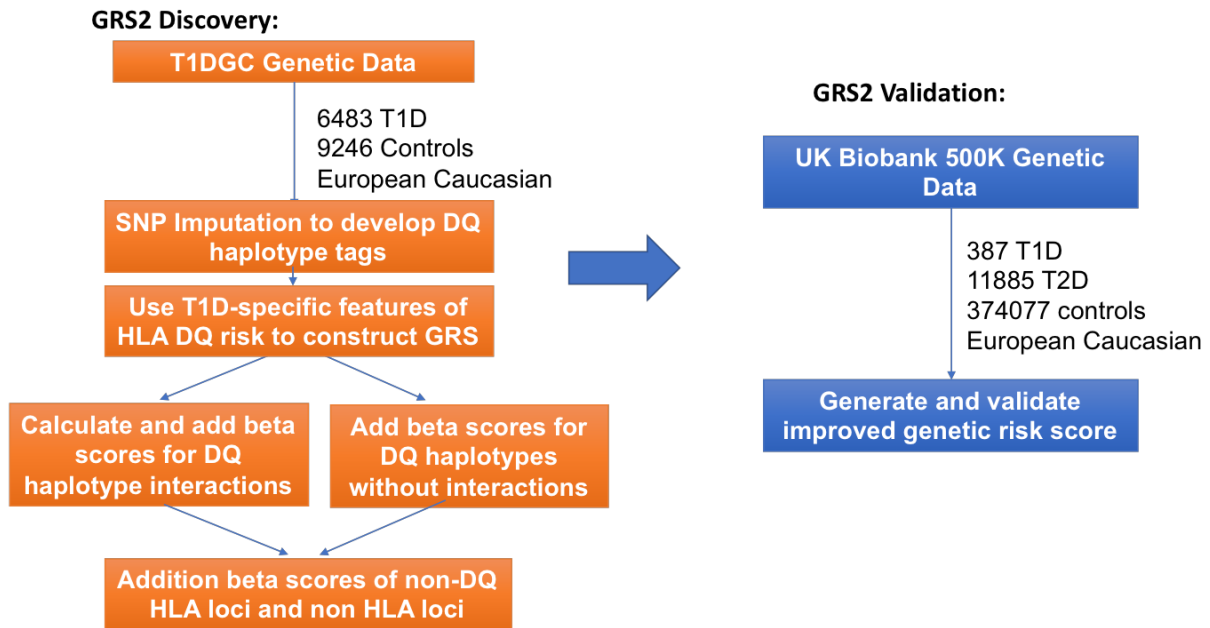

**Supplementary Figure S2 .** Algorithm to generate full T1D-GRS2 score from variants. For haplotypes with an interaction the beta is taken from Table S3, without an interaction it is scored independently for each haplotype of the pair. The sum of scores from the remaining variants is then added.

$$GRS2 = \begin{cases} \beta_{interaction} & \text{Interaction exists (Table S3)} \\ \sum (\beta_{haplotype} * n_{ra}) & \text{No interaction exists} \end{cases} + \sum (\beta_{other-HLA} * n_{ra}) + \sum (\beta_{non-HLA} * n_{ra})$$

- $n_{ra}$  : number of risk alleles at variant
  - $\beta_{haplotype}$  : beta(s) from Table S1
  - $\beta_{interaction}$  : beta from Table S3
  - $\beta_{other-HLA}$  : beta(s) from Table S4
  - $\beta_{non-HLA}$  : beta(s) from Table S5
- ...where  $\beta = \log(Odds\ Ratio)$  for each variant.

SUPPLEMENTARY DATA

**Supplementary Figure S3.** Youden's Index statistic ( $j = \text{sensitivity} + \text{specificity} - 1$ ) versus centile of UK BioBank T1D cases to demonstrate comparative performance of different genetic risk scores and illustrate the level and centile position of each Genetic Risk Score's maximum discrimination.

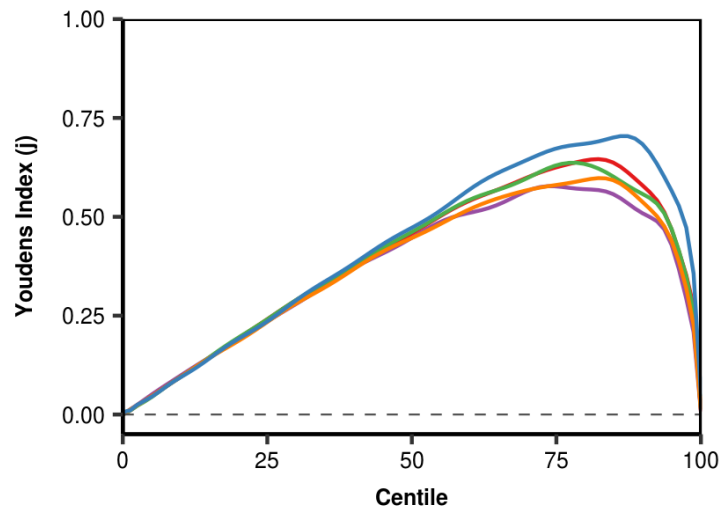

**Supplementary Figure S4.** AUC ROC by onset age in the T1DGC dataset with truncated axis to emphasize improved discrimination of T1D at youngest age.

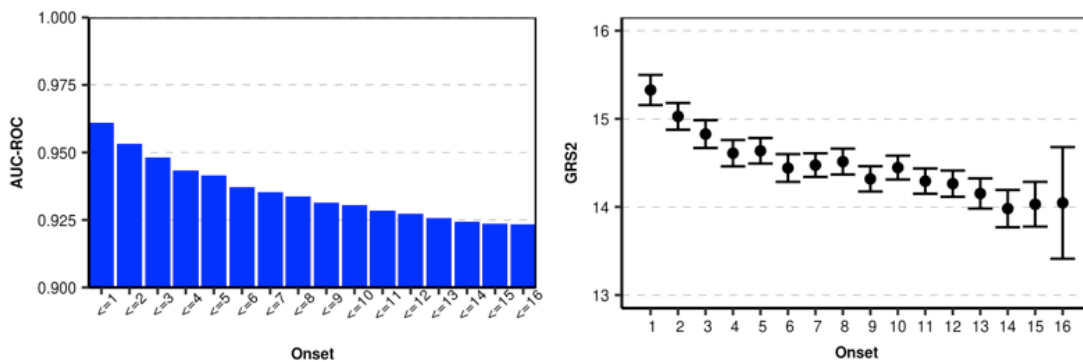

SUPPLEMENTARY DATA

**Supplementary Table S1.** Fourteen HLA DQ haplotypes or alleles included in the T1D GRS2. Also displayed is odds ratios for DR-DQ alleles (adjusted for included haplotype combination odds ratios)

| DQA1  | DQB1  | Freq*  | Marker**    | r <sup>2</sup> | Odds Ratio | Beta  |
|-------|-------|--------|-------------|----------------|------------|-------|
| 03:0X | 03:02 | 0.154  | rs9275490   | 0.987          | 7.99       | 2.08  |
| 01:02 | 06:02 | 0.1437 | rs17843689  | 0.968          | 4.02       | 1.39  |
| 05:01 | 02:01 | 0.1314 | rs9273369   | 0.998          | 3.54       | 1.26  |
| 02:01 | 02:02 | 0.1108 | rs17211699  | 0.985          | 1.62       | 0.48  |
| 05:05 | 03:01 | 0.1106 | rs9469200   | 0.975          | 0.97       | -0.03 |
| 01:0X | 05:01 | 0.1088 | rs10947332  | 0.994          | 0.63       | -0.46 |
| 03:0X | 03:01 | 0.0648 | rs1281935   | 0.882          | 0.53       | -0.63 |
| 01:03 | 06:03 | 0.0567 | rs62406889  | 0.968          | 0.52       | -0.65 |
| 02:01 | 03:03 | 0.0366 | rs28746898  | 0.955          | 0.47       | -0.76 |
| 04:01 | 04:02 | 0.0227 | rs12527228  | 0.956          | 0.41       | -0.89 |
| 01:0X | 05:03 | 0.0208 | rs1794265   | 0.990          | 0.27       | -1.31 |
| 03:02 | 03:03 | 0.0079 | rs9405117   | 0.956          | 0.24       | -1.43 |
| 01:02 | 06:09 | 0.0071 | rs16822632  | 0.954          | 0.11       | -2.21 |
| 01:03 | 06:01 | 0.0066 | rs117806464 | 0.986          | 0.09       | -2.41 |

\*Frequency of HLA haplotypes in European-Americans (Klitz et al 2003 Tissue Antigens)

\*\*Minor allele corresponds to the presence of the indicated haplotype

**Supplementary Table S2.** Heat map of T1D odds ratios of DR-DQ haplotype combinations. Odds ratios are shown whenever there were ≥50 cases (derived from 4,600 total cases). X=any other haplotype not specifically noted.

| Haplotype             | DQA1*03:0X-DQB1*03:02 | DQA1*05:01-DQB1*02:01 | DQA1*04:01-DQB1*04:02 | DQA1*01:0X-DQB1*05:01 | DQA1*03:02-DQB1*03:03 | OTHER | DQA1*02:01-DQB1*02:02 | DQA1*03:0X-DQB1*03:01 | DQA1*05:05-DQB1*03:01 | DQA1*01:03-DQB1*06:03 | DQA1*01:02-DQB1*06:09 | DQA1*01:03-DQB1*06:01 | DQA1*02:01-DQB1*03:03 | DQA1*01:0X-DQB1*05:03 | DQA1*01:02-DQB1*06:02 |
|-----------------------|-----------------------|-----------------------|-----------------------|-----------------------|-----------------------|-------|-----------------------|-----------------------|-----------------------|-----------------------|-----------------------|-----------------------|-----------------------|-----------------------|-----------------------|
| DQA1*03:0X-DQB1*03:02 | 32.30                 | 63.17                 | 24.68                 | 16.14                 | 11.20                 | 14.89 | 8.25                  | 5.26                  | 4.50                  | 5.53                  | 3.94                  |                       | 0.53                  | 0.70                  | 0.73                  |
| DQA1*05:01-DQB1*02:01 | 63.17                 | 20.92                 | 8.63                  | 6.96                  | 19.69                 | 10.16 | 3.24                  | 3.18                  | 1.31                  | 1.14                  | 3.94                  | 1.17                  | 0.47                  |                       | 0.08                  |
| DQA1*04:01-DQB1*04:02 | 24.68                 | 8.63                  | 1.17                  | 5.29                  | 2.33                  | 3.27  | 9.33                  | 2.71                  | 0.42                  | 0.54                  |                       |                       |                       |                       | 0.29                  |
| DQA1*01:0X-DQB1*05:01 | 16.14                 | 6.96                  | 5.29                  | 2.41                  | 6.36                  | 3.33  | 0.86                  | 5.88                  | 0.29                  | 0.10                  | 0.41                  |                       | 0.30                  | 0.32                  | 0.06                  |
| DQA1*03:02-DQB1*03:03 | 11.20                 | 19.69                 | 2.33                  | 6.36                  |                       | 3.00  | 3.37                  | 2.50                  | 1.22                  |                       |                       |                       |                       | 3.50                  |                       |
| OTHER                 | 14.89                 | 10.16                 | 3.27                  | 3.33                  | 3.00                  | 1.00  | 1.19                  | 3.88                  | 0.56                  | 1.42                  | 1.56                  | 0.58                  | 0.32                  |                       | 0.05                  |
| DQA1*02:01-DQB1*02:02 | 8.25                  | 3.24                  | 9.33                  | 0.86                  | 3.37                  | 1.19  | 0.06                  | 2.88                  | 0.79                  |                       | 0.58                  |                       | 0.27                  |                       | 0.08                  |
| DQA1*03:0X-DQB1*03:01 | 5.26                  | 3.18                  | 2.71                  | 5.88                  | 2.50                  | 3.88  | 2.88                  | 3.80                  | 1.22                  | 0.46                  | 0.70                  |                       | 0.38                  | 0.29                  | 0.15                  |
| DQA1*05:05-DQB1*03:01 | 4.50                  | 1.31                  | 0.42                  | 0.29                  | 1.22                  | 0.56  | 0.79                  | 1.22                  | 0.27                  |                       | 0.70                  |                       | 0.10                  |                       | 0.13                  |
| DQA1*01:03-DQB1*06:03 | 5.53                  | 1.14                  | 0.54                  | 0.10                  |                       | 0.56  |                       | 0.46                  |                       |                       |                       |                       |                       |                       | 0.12                  |
| DQA1*01:02-DQB1*06:09 | 3.94                  | 3.94                  |                       | 0.41                  |                       | 1.42  | 0.58                  | 0.70                  | 0.70                  |                       |                       |                       |                       |                       |                       |
| DQA1*01:03-DQB1*06:01 |                       | 1.17                  |                       |                       |                       | 1.56  |                       |                       |                       |                       |                       |                       |                       |                       | 1.75                  |
| DQA1*02:01-DQB1*03:03 | 0.53                  | 0.47                  |                       | 0.30                  |                       | 0.58  | 0.27                  | 0.38                  | 0.10                  |                       |                       |                       |                       |                       | 0.07                  |
| DQA1*01:0X-DQB1*05:03 | 0.70                  |                       |                       | 0.32                  | 3.50                  | 0.32  |                       | 0.29                  |                       |                       |                       |                       |                       |                       |                       |
| DQA1*01:02-DQB1*06:02 | 0.73                  | 0.08                  | 0.29                  | 0.06                  |                       | 0.05  | 0.08                  | 0.15                  | 0.13                  | 0.12                  |                       | 1.75                  | 0.07                  |                       | 0.11                  |

SUPPLEMENTARY DATA

**Supplementary Table S3.** Eighteen GRS2 terms used to account for the interactions shown in Table S2.

\*Shown are logistic regression P-values of multiplicative interaction terms.

| Haplotype 1 |       | Haplotype 2 |       | Interaction |            |       |
|-------------|-------|-------------|-------|-------------|------------|-------|
| DQA1        | DQB1  | DQA1        | DQB1  | P value*    | Odds Ratio | Beta  |
| 05:01       | 02:01 | 03:0X       | 03:02 | 7.6E-23     | 37.80      | 3.63  |
| 03:0X       | 03:01 | 01:0X       | 05:01 | 9.4E-23     | 22.99      | 3.14  |
| 03:0X       | 03:02 | 03:0X       | 03:02 | 1.9E-20     | 10.06      | 2.31  |
| 03:0X       | 03:01 | 03:0X       | 03:02 | 7.6E-19     | 8.70       | 2.16  |
| 05:01       | 02:01 | 03:0X       | 03:01 | 8.1E-16     | 2.96       | 1.08  |
| 03:0X       | 03:01 | 02:01       | 02:02 | 1.2E-10     | 2.90       | 1.06  |
| 04:01       | 04:02 | 02:01       | 02:02 | 2.9E-09     | 1.84       | 0.61  |
| 05:01       | 02:01 | 01:0X       | 05:01 | 5.7E-08     | 1.19       | 0.17  |
| 05:01       | 02:01 | 02:01       | 02:02 | 1.7E-07     | 1.19       | 0.17  |
| 05:01       | 02:01 | 05:01       | 02:01 | 2.9E-07     | 1.06       | 0.05  |
| 01:02       | 06:02 | 01:02       | 06:02 | 5.9E-07     | 0.79       | -0.24 |
| 05:01       | 02:01 | 05:05       | 03:01 | 1.4E-06     | 0.60       | -0.51 |
| 05:01       | 02:01 | 01:03       | 06:03 | 1.7E-06     | 0.52       | -0.65 |
| 03:0X       | 03:02 | 01:03       | 06:03 | 2.9E-06     | 0.50       | -0.69 |
| 03:0X       | 03:01 | 03:0X       | 03:01 | 4.5E-06     | 0.42       | -0.87 |
| 03:02       | 03:03 | 03:0X       | 03:02 | 6.3E-05     | 0.32       | -1.15 |
| 03:0X       | 03:01 | 05:05       | 03:01 | 1.6E-04     | 0.23       | -1.47 |
| 05:01       | 02:01 | 01:02       | 06:02 | 2.6E-04     | 0.14       | -1.94 |

SUPPLEMENTARY DATA

**Supplementary Table S4.** Twenty-one non-DR-DQ loci within the HLA region used in the T1D GRS.

| Locus                 | SNP         | Odds Ratio | Beta  | Allele | MAF*  |
|-----------------------|-------------|------------|-------|--------|-------|
| B*3906                | rs540653847 | 5.94       | 1.78  | GC     | 0.006 |
| XL9 Regulatory        | rs9271346   | 5.43       | 1.69  | T      | 0.183 |
| BTNL2 Regulatory      | rs116522341 | 3.45       | 1.24  | C      | 0.025 |
| Intergenic DRB1-DQA1  | rs1281934   | 2.46       | 0.90  | G      | 0.067 |
| DPB1*1501             | rs2567287   | 2.31       | 0.84  | A      | 0.009 |
| Intergenic BTNL2-DRA1 | rs75658393  | 2.26       | 0.81  | T      | 0.018 |
| A*2402                | rs72848653  | 2.17       | 0.78  | T      | 0.078 |
| A*2902                | rs144530872 | 2.10       | 0.74  | A      | 0.042 |
| Intergenic DRA1-DRB1  | rs9269173   | 1.95       | 0.67  | A      | 0.021 |
| A*0205                | rs9500974   | 1.88       | 0.63  | T      | 0.009 |
| C*0602                | rs12189871  | 1.57       | 0.45  | T      | 0.091 |
| A*0201                | rs12153924  | 1.56       | 0.44  | A      | 0.275 |
| B*1801                | rs371250843 | 1.47       | 0.39  | T      | 0.037 |
| A*0301                | rs9259118   | 1.36       | 0.31  | T      | 0.142 |
| DPB1*0301             | rs559242105 | 1.27       | 0.24  | CTA    | 0.117 |
| DPB1*0101             | rs17214657  | 0.82       | -0.19 | C      | 0.064 |
| DPB1*0501             | rs9378176   | 0.61       | -0.49 | G      | 0.023 |
| B*4403                | rs2524277   | 0.55       | -0.60 | A      | 0.060 |
| DPB1*0402             | rs6934289   | 0.51       | -0.68 | C      | 0.109 |
| B*4501                | rs16899379  | 0.44       | -0.83 | A      | 0.006 |
| B*5701                | rs149663102 | 0.39       | -0.94 | T      | 0.039 |

\*Minor allele frequency within previously described UK Biobank European subset

SUPPLEMENTARY DATA

**Supplementary Table S5.** Thirty-two SNPs marking 31 non-HLA loci used in the GRS2. Genes identified are candidate genes either theorised on directly implicated.

| Gene    | SNP         | Odds Ratio | Beta  | Allele | Source   |
|---------|-------------|------------|-------|--------|----------|
| INS     | rs3842753   | 2.29       | 0.83  | G      | Internal |
| PTPN22  | rs2476601   | 1.89       | 0.64  | A      | Onengut  |
| CTSH    | rs2289702   | 1.32       | 0.28  | C      | Internal |
| ATXN2   | rs653178    | 1.30       | 0.26  | C      | Onengut  |
| COBL    | rs4948088   | 1.30       | 0.26  | C      | Winkler  |
| IL27    | rs9924471   | 1.24       | 0.22  | A      | Poicot   |
| ERBB3   | rs4759229   | 1.24       | 0.22  | A      | Internal |
| PTPN2   | rs1893217   | 1.21       | 0.19  | G      | Onengut  |
| BACH2   | rs72928038  | 1.20       | 0.18  | A      | Onengut  |
| RNLS    | rs60888743  | 1.20       | 0.18  | A      | Internal |
| ITGB7   | rs11170466  | 1.19       | 0.17  | T      | Poicot   |
| UBASH3A | rs9981624   | 1.19       | 0.17  | C      | Internal |
| CENPW   | rs9388489   | 1.17       | 0.16  | A      | Onengut  |
| HORMAD2 | rs5763779   | 1.16       | 0.15  | A      | Internal |
| PRKD2   | rs425105    | 1.16       | 0.15  | T      | Onengut  |
| RASGRP1 | rs72727394  | 1.15       | 0.14  | T      | Onengut  |
| ADAD1   | rs17388568  | 1.13       | 0.12  | A      | Poicot   |
| CD226   | rs1615504   | 1.13       | 0.12  | T      | Onengut  |
| COBL    | rs6476839   | 1.12       | 0.11  | T      | Onengut  |
| IRF7    | rs9585056   | 1.12       | 0.11  | C      | Onengut  |
| C1QTNF6 | rs229541    | 1.11       | 0.10  | A      | Poicot   |
| SIRPG   | rs2281808   | 1.11       | 0.10  | C      | Steck    |
| TAGAP   | rs1738074   | 0.92       | -0.08 | T      | Poicot   |
| MEG3    | rs56994090  | 0.88       | -0.13 | C      | Onengut  |
| CLEC1   | rs10492166  | 0.87       | -0.14 | A      | Poicot   |
| PTPN22  | rs3024505   | 0.86       | -0.15 | A      | Onengut  |
| IFIH1   | rs2111485   | 0.85       | -0.16 | A      | Onengut  |
| CTLA4   | rs3087243   | 0.84       | -0.17 | A      | Onengut  |
| CLEC16A | rs12708716  | 0.83       | -0.19 | G      | Poicot   |
| TYK2    | rs144309607 | 0.67       | -0.40 | T      | Onengut  |
| IL2RA   | rs61839660  | 0.62       | -0.48 | T      | Onengut  |
| IL2RA   | rs41295121  | 0.49       | -0.71 | T      | Onengut  |

SUPPLEMENTARY DATA

**Supplementary Table S6.** Case control discrimination of recently published type 1 diabetes genetic risk scores comparing by GRS value and corresponding Youden's index value referenced against interval centiles of T1D cases in UK Biobank.

| Population Centile (UKB) | T1D GRS1            |              | TEDDY GRS           |              | Winkler GRS           |              | Perry GRS             |              | T1D GRS2            |              |
|--------------------------|---------------------|--------------|---------------------|--------------|-----------------------|--------------|-----------------------|--------------|---------------------|--------------|
|                          | Value               | J*           | Value               | J*           | Value                 | J*           | Value                 | J*           | Value               | J*           |
| 5                        | 9.76                | 0.046        | 8.75                | 0.048        | 6.52                  | 0.050        | 9.53                  | 0.045        | 6.49                | 0.047        |
| 10                       | 10.42               | 0.094        | 9.16                | 0.095        | 6.92                  | 0.099        | 10.30                 | 0.095        | 7.21                | 0.092        |
| 15                       | 10.93               | 0.144        | 9.44                | 0.145        | 7.19                  | 0.143        | 10.85                 | 0.145        | 7.70                | 0.142        |
| 20                       | 11.49               | 0.193        | 9.66                | 0.185        | 7.42                  | 0.185        | 11.36                 | 0.195        | 8.12                | 0.190        |
| 25                       | 12.02               | 0.242        | 9.87                | 0.236        | 7.63                  | 0.234        | 11.83                 | 0.242        | 8.51                | 0.237        |
| 30                       | 12.41               | 0.289        | 10.06               | 0.284        | 7.82                  | 0.278        | 12.23                 | 0.288        | 8.88                | 0.287        |
| 35                       | 12.70               | 0.335        | 10.24               | 0.318        | 8.0                   | 0.329        | 12.55                 | 0.332        | 9.25                | 0.337        |
| 40                       | 12.95               | 0.378        | 10.41               | 0.367        | 8.17                  | 0.369        | 12.83                 | 0.378        | 9.62                | 0.382        |
| 45                       | 13.18               | 0.413        | 10.59               | 0.410        | 8.35                  | 0.404        | 13.08                 | 0.419        | 9.98                | 0.430        |
| 50                       | 13.40               | 0.462        | 10.77               | 0.444        | 8.53                  | 0.449        | 13.32                 | 0.464        | 10.34               | 0.472        |
| 55                       | 13.63               | 0.502        | 10.96               | 0.480        | 8.72                  | 0.490        | 13.56                 | 0.502        | 10.69               | 0.517        |
| 60                       | 13.87               | 0.542        | 11.15               | 0.518        | 8.91                  | 0.513        | 13.80                 | 0.541        | 11.03               | 0.567        |
| 65                       | 14.13               | 0.572        | 11.36               | 0.548        | 9.12                  | 0.531        | 14.05                 | 0.568        | 11.38               | 0.612        |
| 70                       | 14.40               | 0.598        | 11.58               | 0.570        | 9.34                  | 0.571        | 14.32                 | 0.598        | 11.72               | 0.641        |
| 75                       | 14.68               | 0.625        | 11.82               | 0.578        | <b>9.58</b>           | <b>0.577</b> | 14.60                 | 0.631        | 12.07               | 0.673        |
| 80                       | <b>14.98</b>        | <b>0.645</b> | <b>12.08</b>        | <b>0.595</b> | 9.85                  | 0.568        | <b>14.92</b>          | <b>0.638</b> | 12.45               | 0.684        |
| 85                       | 15.30               | 0.629        | 12.39               | 0.589        | 10.16                 | 0.572        | 15.27                 | 0.600        | <b>12.88</b>        | <b>0.698</b> |
| 90                       | 15.70               | 0.576        | 12.79               | 0.529        | 10.56                 | 0.510        | 15.68                 | 0.549        | 13.41               | 0.684        |
| 95                       | 16.34               | 0.472        | 13.41               | 0.437        | 11.2                  | 0.424        | 16.31                 | 0.464        | 14.19               | 0.563        |
| <b>AUC-ROC**</b>         | 0.893 (0.877-0.908) |              | 0.874 (0.856-0.891) |              | 0.868 (0.851 - 0.885) |              | 0.891 (0.875 - 0.906) |              | 0.921 (0.907-0.935) |              |

\*Youdens index  $J=(\text{specificity} + \text{sensitivity} - 1)$

\*\* (95% Confidence intervals)
